# Supplementary material for: Third-grade school performance in children with special healthcare needs: a prospective cohort study
Source: PubMed Central journal article supplement — BMJ Paediatr Open. 2024 Dec 3;8(1):e002987. doi: 10.1136/bmjpo-2024-002987 (PMC11624720; doi:10.1136/bmjpo-2024-002987), 2024-12-03
Supplement: bmjpo-14-12-s001.pdf [file bmjpo-14-12-s001.pdf]

**Table 1.** Characteristics of children within the study region (study population), children enrolled into the ikidS II study (study participants), and children included in the analysis (study sample)\*

|                                  | <b>Study population</b><br>(n = 3,683) | <b>Cohort participants<br/>in third grade</b><br>(n = 848) | <b>Analysis sample</b><br>(n = 751) |
|----------------------------------|----------------------------------------|------------------------------------------------------------|-------------------------------------|
| <b>Child</b>                     |                                        |                                                            |                                     |
| Gender                           |                                        |                                                            |                                     |
| Male                             | 1,909 (51.9)                           | 427 (50.4)                                                 | 379 (50.5)                          |
| Female                           | 1,767 (48.1)                           | 421 (49.6)                                                 | 372 (49.5)                          |
| Missing                          | 7                                      | 0                                                          |                                     |
| Age at PHE, mean (SD) [years]    | 5.9 (0.4)                              | 5.9 (0.4)                                                  | 5.9 (0.4)                           |
| Missing                          | 1                                      | 0                                                          | 0                                   |
| Immigrant status                 |                                        |                                                            |                                     |
| Yes                              | 822 (25.5)                             | 74 (9.1)                                                   | 57 (7.9)                            |
| No                               | 2,397 (74.5)                           | 739 (90.9)                                                 | 664 (92.1)                          |
| Missing                          | 464                                    | 35                                                         | 30                                  |
| Multiple at birth                |                                        |                                                            |                                     |
| Yes                              | 105 (2.9)                              | 21 (2.5)                                                   | 18 (2.4)                            |
| No                               | 3,542 (97.1)                           | 817 (97.5)                                                 | 731 (97.6)                          |
| Missing                          | 36                                     | 10                                                         | 2                                   |
| Breastfeeding                    |                                        |                                                            |                                     |
| Not at all                       | 573 (17.5)                             | 95 (11.5)                                                  | 80 (10.9)                           |
| Up to 6 months                   | 1,312 (40.2)                           | 327 (39.6)                                                 | 289 (39.4)                          |
| More than 6 months               | 1,382 (42.3)                           | 403 (48.8)                                                 | 364 (49.7)                          |
| Missing                          | 416                                    | 23                                                         | 18                                  |
| <b>Family</b>                    |                                        |                                                            |                                     |
| Abitur (A level exams)† Mother   |                                        |                                                            |                                     |
| Yes                              | 1,825 (60.4)                           | 609 (75.9)                                                 | 552 (77.3)                          |
| No                               | 1,196 (39.6)                           | 193 (24.1)                                                 | 162 (22.7)                          |
| Missing                          | 662                                    | 46                                                         | 37                                  |
| Abitur (A level exams)† Father   |                                        |                                                            |                                     |
| Yes                              | 1,768 (61)                             | 572 (72.6)                                                 | 521 (74.1)                          |
| No                               | 1,131 (39)                             | 216 (27.4)                                                 | 182 (25.9)                          |
| Missing                          | 784                                    | 60                                                         | 48                                  |
| <b>School location</b>           |                                        |                                                            |                                     |
| District of Mainz-Bingen (rural) | 1,910 (51.9)                           | 471 (55.5)                                                 | 416 (55.4)                          |
| City of Mainz (urban)            | 1,773 (48.1)                           | 377 (44.5)                                                 | 335 (44.6)                          |

\* Unless otherwise stated, values are expressed as n (%). % relate to non-missing values.

† Including advanced technical college entrance qualification.

Abbreviations: *PHE* preschool health examination, *SD* standard deviation
